# Supplementary material for: Divergent Roles of Circadian Regulators CLOCK and CRY1 in Driving Pro-Tumoral Stemness and Immunoevasion in Osteosarcoma
Source: Research Square preprint supplement (doi:10.21203/rs.3.rs-7167173/v1), 2025-07-24
Supplement: Supplementary file 1 [file efc8983eace308fe56442816.pdf]

## Supplementary Figures

|               |       | <i>BMAL1</i> |          | <i>CLOCK</i> |          | <i>CRY1</i> |          | <i>CRY2</i> |          |
|---------------|-------|--------------|----------|--------------|----------|-------------|----------|-------------|----------|
| Genes         | Types | R            | p-value  | R            | p-value  | R           | p-value  | R           | p-value  |
| <i>MYC</i>    | SARC  | 0.05         | 0.42     | 0.099        | 0.11     | 0.035       | 0.58     | -0.15       | 1.40E-02 |
| <i>SOX2</i>   | SARC  | 0.19         | 2.20E-03 | 0.082        | 0.18     | 0.18        | 4.40E-03 | 0.015       | 0.017    |
| <i>CD44</i>   | SARC  | 0.064        | 0.30     | 0.096        | 0.12     | -0.055      | 0.37     | 0.00072     | 0.99     |
| <i>CD133</i>  | SARC  | -0.059       | 0.34     | 0.13         | 3.90E-02 | 0.13        | 3.10E-02 | 0.04        | 0.52     |
| <i>NANOG</i>  | SARC  | 0.014        | 0.82     | -0.0099      | 0.87     | 0.097       | 0.12     | -0.0031     | 0.96     |
| <i>POU5F1</i> | SARC  | 0.053        | 0.39     | 0.12         | 0.06     | 0.096       | 0.12     | 0.0086      | 0.89     |
| <i>CDH2</i>   | SARC  | 0.046        | 0.46     | 0.19         | 2.00E-03 | 0.12        | 4.40E-02 | -0.075      | 0.23     |
| <i>ZEB1</i>   | SARC  | 0.14         | 2.90E-02 | 0.44         | 5.20E-14 | 0.45        | 1.9E-14  | 0.34        | 2.4E-08  |
| <i>ZEB2</i>   | SARC  | 0.19         | 2.40E-03 | 0.22         | 2.50E-04 | 0.36        | 3.60E-04 | 0.18        | 2.90E-02 |
| <i>VIM</i>    | SARC  | 0.12         | 0.06     | 0.013        | 0.84     | -0.0084     | 0.89     | -0.13       | 3.30E-02 |

R: Pearson correlation coefficient

Neg. Corr. Pos. Corr.  
-0.5 0 0.5

**Figure S1. Differential gene correlations between core clock regulators and CSC/EMT-associated factors in human sarcoma.** Table showing the Pearson's correlation coefficients (*R* values) and corresponding *p*-values to indicate correlations between the expressions of *BMAL1*, *CLOCK*, *CRY1*, and *CRY2* and genes associated with cancer stem cell (CSC) properties (*MYC*, *SOX2*, *CD44*, *CD133* [*PROM1*], *NANOG*, *POU5F1* [*OCT4*]) or epithelial-mesenchymal transition (EMT) (*CDH2*, *ZEB1*, *ZEB2*, *VIM*) in sarcoma (SARC) patient samples. Positive correlations ( $R > 0$ ) are shown in red shades, while negative correlations ( $R < 0$ ) are in blue shades. Significant correlations ( $p < 0.05$ ) are indicated with red or blue *p*-values in scientific notation, while non-significant correlations are displayed with black *p*-values in general notation. The data were sourced from GEPIA (<http://gepia.cancer-pku.cn/>).

|                 |       | <i>BMAL1</i> |          | <i>CLOCK</i> |          | <i>CRY1</i> |          | <i>CRY2</i> |          |
|-----------------|-------|--------------|----------|--------------|----------|-------------|----------|-------------|----------|
| Genes           | Types | R            | p-value  | R            | p-value  | R           | p-value  | R           | p-value  |
| <i>DGAT1</i>    | SARC  | 0.053        | 0.39     | -0.014       | 0.82     | 0.13        | 3.40E-02 | 0.061       | 0.32     |
| <i>DGAT2</i>    | SARC  | -0.044       | 0.48     | 0.04         | 0.52     | -0.0025     | 0.97     | 0.12        | 0.047    |
| <i>ACSL4</i>    | SARC  | 0.13         | 3.50E-02 | 0.18         | 2.70E-03 | 0.13        | 4.70E-02 | -0.09       | 0.15     |
| <i>FASN</i>     | SARC  | 0.067        | 0.28     | 0.025        | 0.68     | 0.14        | 2.20E-02 | -0.1        | 0.09     |
| <i>CHKA</i>     | SARC  | -0.013       | 0.83     | 0.067        | 0.28     | 0.12        | 0.05     | 0.046       | 0.46     |
| <i>SREBF1</i>   | SARC  | 0.11         | 0.09     | 0.066        | 0.29     | 0.055       | 0.380    | 0.082       | 0.18     |
| <i>SLC2A1</i>   | SARC  | 0.086        | 0.16     | 0.3          | 9.10E-07 | 0.17        | 4.80E-03 | -0.1        | 0.096    |
| <i>SLC16A1</i>  | SARC  | 0.071        | 0.25     | 0.38         | 1.60E-10 | 0.35        | 3.9E-09  | 0.11        | 0.081    |
| <i>LDHA</i>     | SARC  | 0.039        | 0.53     | 0.14         | 1.90E-02 | 0.022       | 0.72     | -0.11       | 0.08     |
| <i>HK1</i>      | SARC  | 0.089        | 0.15     | 0.18         | 4.20E-03 | 0.16        | 8.10E-03 | -0.017      | 0.78     |
| <i>HK2</i>      | SARC  | 0.078        | 0.21     | 0.058        | 0.35     | 0.013       | 0.83     | -0.21       | 7.50E-04 |
| <i>PFKFB3</i>   | SARC  | 0.093        | 0.13     | 0.078        | 0.21     | 0.096       | 0.12     | -0.091      | 0.14     |
| <i>PKM</i>      | SARC  | 0.047        | 0.45     | 0.11         | 0.07     | 0.077       | 0.22     | -0.21       | 5.60E-04 |
| <i>HIF1A</i>    | SARC  | 0.13         | 4.30E-02 | 0.27         | 7.70E-06 | 0.18        | 3.10E-03 | 0.096       | 0.12     |
| <i>PRKAA1</i>   | SARC  | 0.18         | 3.80E-03 | 0.52         | 2.00E-29 | 0.39        | 6.80E-11 | 0.32        | 1.10E-07 |
| <i>PRKAA2</i>   | SARC  | 0.052        | 0.40     | 0.19         | 2.30E-03 | 0.17        | 5.10E-03 | 0.23        | 2.20E-04 |
| <i>PPARGC1A</i> | SARC  | -0.01        | 0.87     | 0.11         | 0.07     | 0.083       | 0.18     | 0.16        | 1.10E-02 |
| <i>TFAM</i>     | SARC  | 0.2          | 8.40E-04 | 0.38         | 1.90E-10 | 0.36        | 2.90E-09 | 0.13        | 3.80E-02 |
| <i>SIRT3</i>    | SARC  | 0.29         | 1.50E-06 | 0.089        | 0.15     | 0.2         | 1.30E-03 | 0.39        | 3.90E-11 |

R: Pearson correlation coefficient

Neg. Corr.  Pos. Corr.

**Figure S2. Differential gene correlations between core clock regulators and onco-metabolic genes in human sarcoma.** Table showing the Pearson's correlation coefficients ( $R$  values) and corresponding  $p$ -values to indicate correlations between the expressions of *BMAL1*, *CLOCK*, *CRY1*, and *CRY2* and the indicated genes associated with lipid metabolism (light blue), glycolysis (light orange), and mitochondrial metabolism (light green) in sarcoma patient samples. Positive correlations ( $R > 0$ ) are shown in red shades, while negative correlations ( $R < 0$ ) are in blue shades. Significant correlations ( $p < 0.05$ ) are indicated with red or blue  $p$ -values in scientific notation, while non-significant correlations are displayed with black  $p$ -values in general notation. The data were sourced from GEPIA (<http://gepia.cancer-pku.cn/>).

|                 |       | <i>BMAL1</i> |          | <i>CLOCK</i> |          | <i>CRY1</i> |          | <i>CRY2</i> |          |
|-----------------|-------|--------------|----------|--------------|----------|-------------|----------|-------------|----------|
| Genes           | Types | R            | p-value  | R            | p-value  | R           | p-value  | R           | p-value  |
| <i>SKP2</i>     | SARC  | 0.058        | 0.35     | 0.35         | 5.1E-09  | 0.37        | 1.10E-09 | -0.0038     | 0.95     |
| <i>KIF20A</i>   | SARC  | 0.048        | 0.44     | 0.31         | 2.1E-07  | 0.39        | 4.60E-11 | 0.043       | 0.48     |
| <i>CCNF</i>     | SARC  | 0.11         | 0.09     | 0.31         | 4.80E-07 | 0.37        | 6.20E-10 | -0.01       | 0.87     |
| <i>TROAP</i>    | SARC  | -0.018       | 0.77     | 0.13         | 3.00E-02 | 0.22        | 2.90E-04 | -0.14       | 2.40E-02 |
| <i>PHB</i>      | SARC  | 0.022        | 0.72     | 0.018        | 0.70     | 0.036       | 0.57     | -0.15       | 1.50E-02 |
| <i>CKS1B</i>    | SARC  | 0.11         | 0.06     | 0.15         | 1.90E-02 | 0.28        | 3.6E-06  | -0.015      | 0.81     |
| <i>MCM3</i>     | SARC  | 0.11         | 0.07     | 0.38         | 1.2E-10  | 0.42        | 1.5E-12  | 0.09        | 0.15     |
| <i>CCNA2</i>    | SARC  | 0.049        | 0.43     | 0.34         | 1.4E-08  | 0.45        | 3.7E-14  | -0.011      | 0.86     |
| <i>TRIP13</i>   | SARC  | 0.003        | 0.96     | 0.28         | 4.50E-06 | 0.26        | 2.70E-05 | -0.071      | 0.25     |
| <i>CENPM</i>    | SARC  | -0.033       | 0.60     | 0.11         | 0.07     | 0.16        | 8.10E-03 | -0.2        | 1.20E-03 |
| <i>HSP90AB1</i> | SARC  | 0.18         | 3.50E-03 | 0.13         | 3.90E-02 | 0.25        | 4.30E-05 | 0.13        | 3.00E-02 |
| <i>JUN</i>      | SARC  | 0.078        | 0.21     | 0.063        | 0.31     | 0.059       | 0.34     | 0.067       | 0.28     |
| <i>CKS2</i>     | SARC  | -0.0049      | 0.94     | 0.17         | 5.90E-03 | 0.2         | 9.70E-04 | -0.19       | 2.50E-03 |
| <i>TK1</i>      | SARC  | -0.077       | 0.21     | 0.084        | 0.08     | 0.13        | 3.30E-02 | -0.19       | 1.90E-03 |
| <i>KIF4A</i>    | SARC  | 0.15         | 1.80E-02 | 0.36         | 1.90E-09 | 0.44        | 4.20E-14 | -0.035      | 0.57     |

R: Pearson correlation coefficient

Neg. Corr.  Pos. Corr.  
-0.5 0 0.5

**Figure S3. Differential gene correlations between core clock regulators and metastasis-associated genes in human sarcoma.** Table showing the Pearson's correlation coefficients (*R* values) and corresponding *p*-values to indicate correlations between the expressions of *BMAL1*, *CLOCK*, *CRY1*, and *CRY2* and the indicated pro-metastatic genes in sarcoma patient samples. Positive correlations ( $R > 0$ ) are shown in red shades, while negative correlations ( $R < 0$ ) are in blue shades. Significant correlations ( $p < 0.05$ ) are indicated with red or blue *p*-values in scientific notation, while non-significant correlations are displayed with black *p*-values in general notation. The data were sourced from GEPIA (<http://gepia.cancer-pku.cn/>).

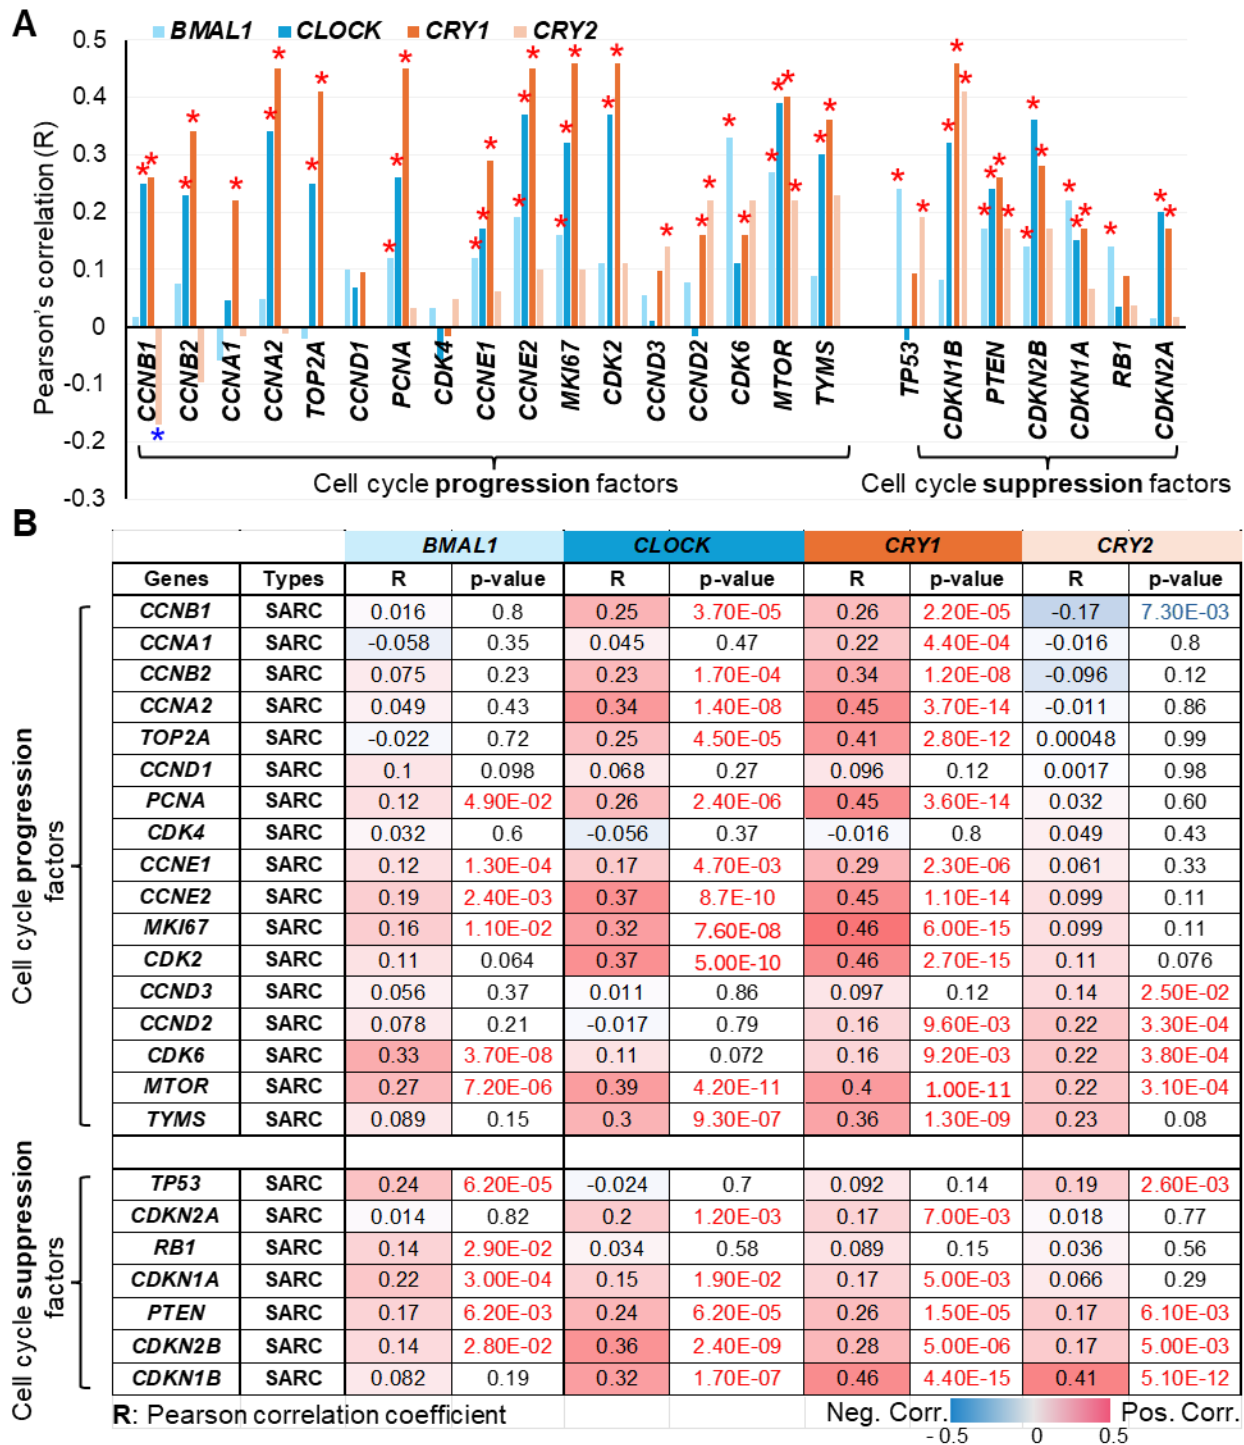

**Figure S4. Differential gene correlations between core circadian regulators and cell cycle regulatory factors in human sarcoma.** (A) Bar graph showing the correlations between the expressions of *BMAL1*, *CLOCK*, *CRY1*, and *CRY2* and the indicated genes associated with cell cycle progression or suppression in sarcoma patient samples. The Pearson's correlation

coefficient ( $R$ ) was used to assess linear relationships between the gene pairs. Significant positive correlations ( $R > 0$ ,  $p < 0.05$ ) are marked with red asterisks, and significant negative correlations ( $R < 0$ ,  $p < 0.05$ ) are marked with blue asterisks. **(B)** Table showing the numerical  $R$  values and corresponding  $p$ -values for the comparisons shown in (A). Positive correlations ( $R > 0$ ) are shown in red shades, while negative correlations ( $R < 0$ ) are in blue shades. Significant correlations ( $p < 0.05$ ) are indicated with red or blue  $p$ -values in scientific notation, while non-significant correlations are displayed with black  $p$ -values in general notation. The data were sourced from GEPIA (<http://gepia.cancer-pku.cn/>). CCNB1: cyclin B1, CCNA1: cyclin A1, CCNB2: cyclin B2, CCNA2: cyclin A2, TOP2A: topoisomerase II alpha, CCND1: cyclin D1, PCNA: proliferating cell nuclear antigen, CDK4: cyclin-dependent kinase 4, CCNE1: cyclin E1, CCNE2: cyclin E2, MKI67: marker of proliferation Ki-67, CDK2: cyclin-dependent kinase 2, CCND3: cyclin D3, CCND2: cyclin D2, CDK6: cyclin-dependent kinase 6, MTOR: mechanistic target of rapamycin kinase, TYMS: thymidylate synthetase, TP53: tumor protein p53, CDKN2A: cyclin-dependent kinase inhibitor 2A, RB1: retinoblastoma 1, CDKN1A: cyclin-dependent kinase inhibitor 1A, PTEN: phosphatase and tensin homolog, CDKN2B: cyclin-dependent kinase inhibitor 2B, CDKN1B: cyclin-dependent kinase inhibitor 1B.

|                |       | <i>BMAL1</i> |          | <i>CLOCK</i> |          | <i>CRY1</i> |          | <i>CRY2</i> |          |
|----------------|-------|--------------|----------|--------------|----------|-------------|----------|-------------|----------|
| Genes          | Types | R            | p-value  | R            | p-value  | R           | p-value  | R           | p-value  |
| <i>WISP1</i>   | SARC  | 0.093        | 0.13     | 0.092        | 0.14     | 0.3         | 1.00E-06 | 0.16        | 1.00E-02 |
| <i>VEGFA</i>   | SARC  | 0.14         | 2.10E-02 | 0.035        | 0.57     | 0.13        | 3.80E-02 | 0.011       | 0.86     |
| <i>POSTN</i>   | SARC  | 0.14         | 2.50E-02 | 0.023        | 0.72     | 0.15        | 1.40E-02 | 0.12        | 0.06     |
| <i>MICB</i>    | SARC  | 0.22         | 3.40E-04 | 0.14         | 2.40E-02 | 0.2         | 9.10E-04 | -0.013      | 0.83     |
| <i>CD276</i>   | SARC  | 0.13         | 3.70E-02 | 0.065        | 0.29     | 0.13        | 3.70E-02 | 0.07        | 0.26     |
| <i>TNC</i>     | SARC  | 0.11         | 0.07     | 0.21         | 5.10E-04 | 0.3         | 8.90E-07 | 0.07        | 0.26     |
| <i>HAS3</i>    | SARC  | 0.093        | 0.13     | 0.2          | 1.50E-03 | 0.21        | 5.10E-04 | 0.082       | 0.19     |
| <i>ITGA4</i>   | SARC  | 0.073        | 0.24     | 0.091        | 0.14     | 0.24        | 7.00E-05 | 0.096       | 0.12     |
| <i>CD39</i>    | SARC  | -0.028       | 0.65     | 0.21         | 7.80E-04 | 0.2         | 9.80E-04 | 0.21        | 5.00E-04 |
| <i>ADORA2B</i> | SARC  | 0.083        | 0.18     | 0.18         | 3.10E-03 | 0.11        | 0.07     | -0.056      | 0.36     |

R: Pearson correlation coefficient

Neg. Corr. 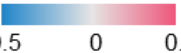 Pos. Corr.  
-0.5 0 0.5

**Figure S5. Differential gene correlations between core circadian regulators and pro-tumoral immunomodulatory factors in human sarcoma.** Table showing the Pearson's correlation coefficients ( $R$  values) and corresponding  $p$ -values to indicate correlations between the expressions of *BMAL1*, *CLOCK*, *CRY1*, and *CRY2* and the indicated pro-tumoral immunomodulatory genes in sarcoma patient samples. Positive correlations ( $R > 0$ ) are shown in red shades, while negative correlations ( $R < 0$ ) are in blue shades. Significant correlations ( $p < 0.05$ ) are indicated with red or blue  $p$ -values in scientific notation, while non-significant correlations are displayed with black  $p$ -values in general notation. The data were sourced from GEPIA (<http://gepia.cancer-pku.cn/>).

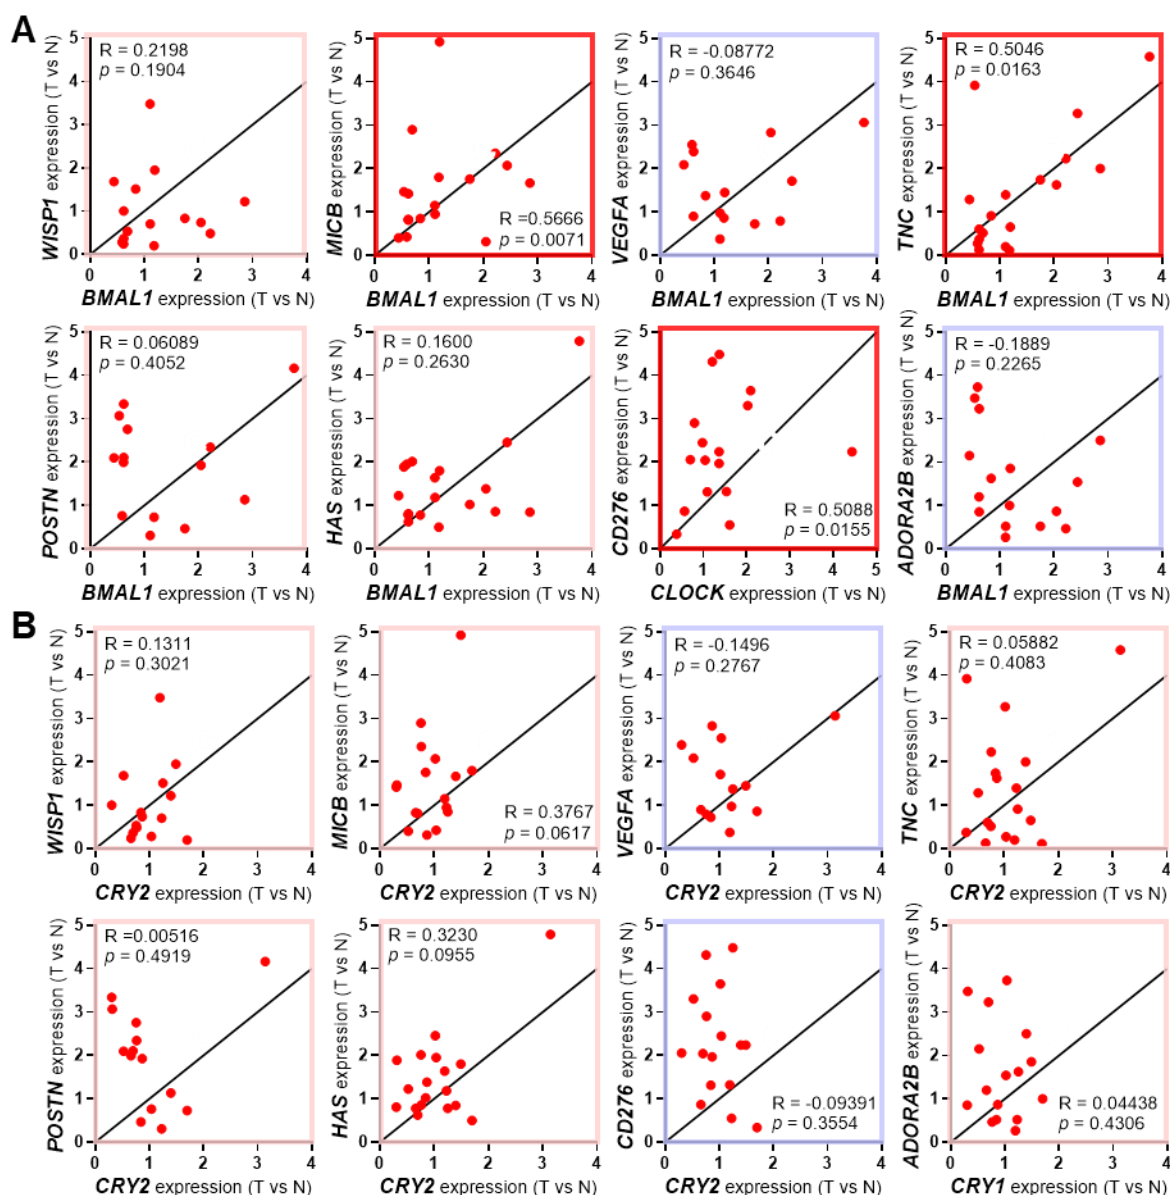

**Figure S6. Differential gene correlations between *BMAL1*/*CRY2* and pro-tumoral immunomodulatory genes in human osteosarcoma.** (A, B) Representative pairwise gene correlation plots illustrating distinct correlation patterns between *BMAL1* (A) or *CRY2* (B) and the indicated pro-tumoral immunomodulatory genes. The Spearman's correlation coefficient ( $R$ ) was used to evaluate the linear relationships between the selected gene expression pairs in publicly available RNA sequencing data (GSE99671) by calculating the differential expression ratios of the core clock components and immunomodulatory genes in tumor (T) versus normal (N) tissues from human osteosarcoma (OS) patients. Significant positive correlations are boxed in bold red ( $R > 0$ ,  $p < 0.05$ ), and significant negative correlations are boxed in bold blue ( $R < 0$ ,  $p < 0.05$ ). WISP1: WNT1 inducible signaling pathway protein 1, MICB: MHC class I polypeptide-related chain B, POSTN: periostin, VEGFA: vascular endothelial growth factor A, TNC: tenascin

C, ITGA4: integrin subunit alpha 4, HAS3: hyaluronan synthase 3, CD276: cluster of differentiation 276 (also known as B7-H3), ADORA2B: adenosine receptor A2B.



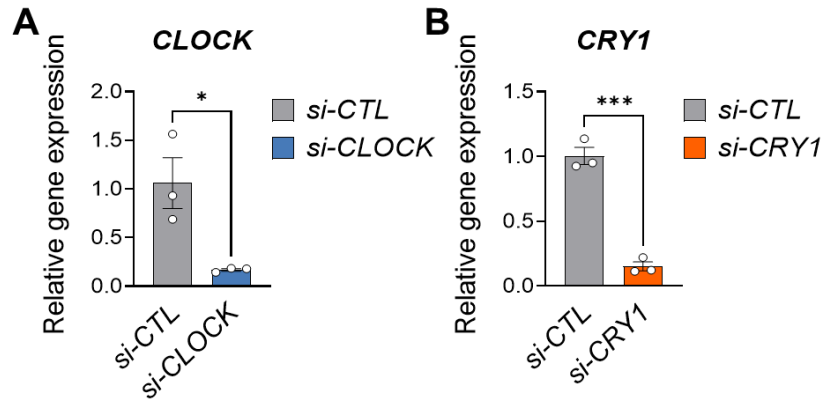

**Figure S7. Knockdown efficiency of siRNAs targeting *CLOCK* and *CRY1* in 143B OS CSCs.** (A, B) qPCR analysis validating the knockdown of *CLOCK* (A) and *CRY1* (B) gene expression in 143B OS CSCs 48 hours after transfection with siRNAs specifically targeting each clock gene.

# **A** Association of immune cell infiltration with selected gene expression human SARC

| Genes          | CD8+ T cells | CD4+ T cells | Dendritic cells | Macrophages | Tregs | CAFs  | MDSCs |
|----------------|--------------|--------------|-----------------|-------------|-------|-------|-------|
| <i>SOX2</i>    | n.s.         | -0.183       | -0.174          | -0.211      | n.s.  | n.s.  | 0.328 |
| <i>CD133</i>   | n.s.         | -0.2         | -0.352          | -0.353      | n.s.  | n.s.  | 0.333 |
| <i>ZEB1</i>    | n.s.         | -0.278       | -0.237          | n.s.        | 0.134 | 0.414 | 0.199 |
| <i>SLC16A1</i> | n.s.         | -0.379       | -0.19           | -0.216      | n.s.  | 0.185 | 0.255 |
| <i>WISP1</i>   | 0.303        | -0.21        | 0.215           | n.s.        | n.s.  | 0.3   | 0.19  |
| <i>VEGFA</i>   | n.s.         | -0.203       | n.s.            | 0.141       | n.s.  | 0.17  | 0.21  |
| <i>TNC</i>     | 0.158        | -0.271       | -0.317          | -0.317      | n.s.  | 0.116 | 0.335 |

Spearman's  $\rho$  : positive correlation ( $p < 0.05$ ,  $\rho > 0$ )  
 Spearman's  $\rho$  : negative correlation ( $p < 0.05$ ,  $\rho < 0$ )  
 Spearman's  $\rho$  : Not significant n.s. ( $p > 0.05$ )

-0.5      0      0.5

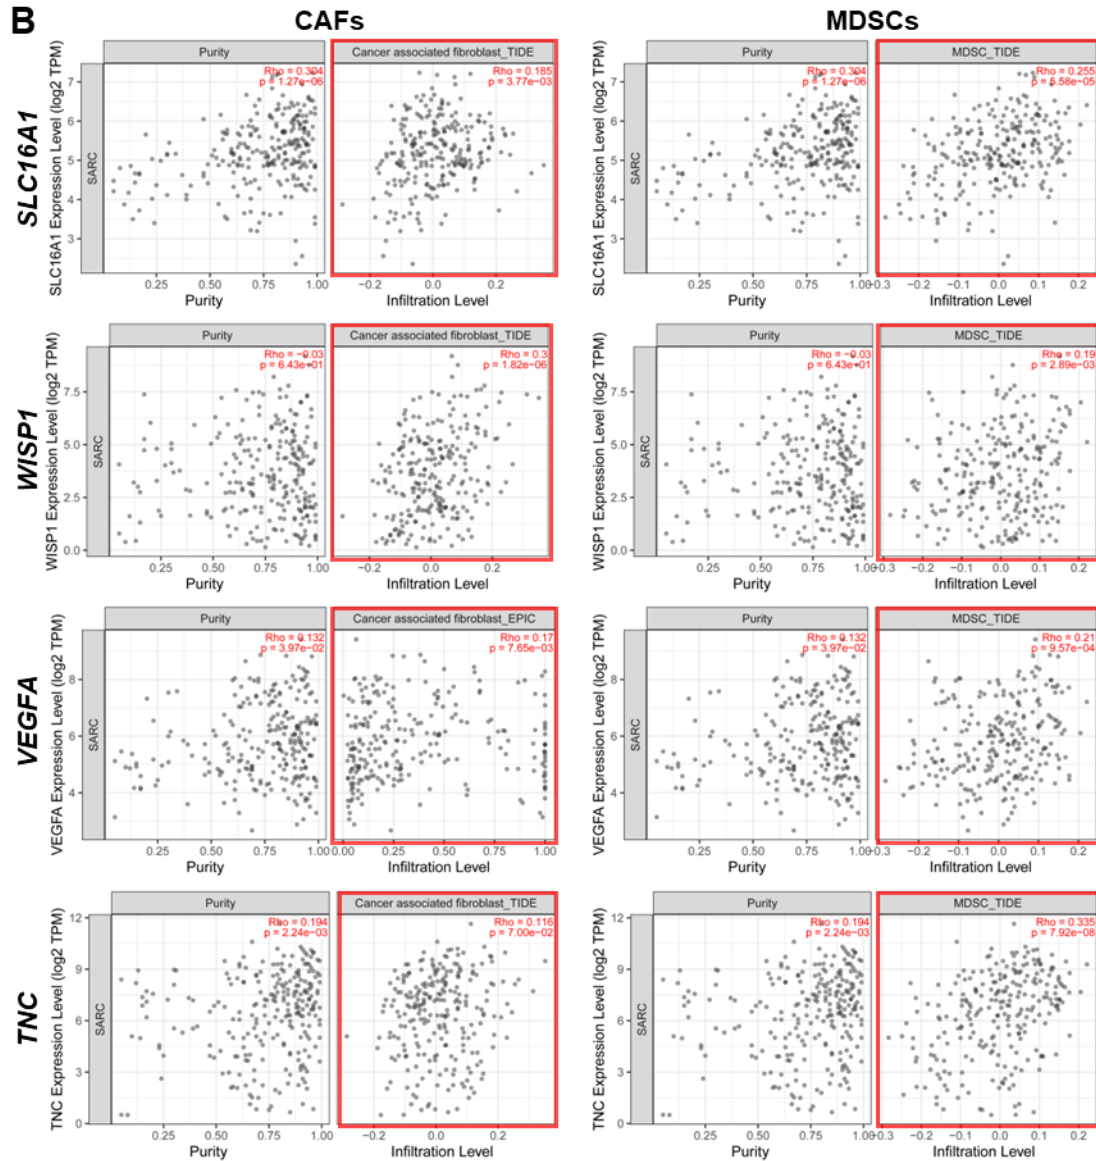

**Figure S8. CSC/EMT-associated onco-metabolic and immune factors positively correlated with *CLOCK* and *CRY1* expression shape a pro-tumoral immune microenvironment in**

**human osteosarcoma by promoting immunosuppressive cell infiltration.** (A) Table showing the associations between the expressions of CSC/EMT markers (*SOX2*, *CD133*, *ZEB1*) and related glycolytic (*SLC16A1*) and immunomodulatory factors (*WISP1*, *VEGFA*, *TNC*) that are strongly positively correlated with *CLOCK* and *CRY1* expression (Figs. 2–5) as well as the infiltration of immune cells (CD4<sup>+</sup> T cells, CD8<sup>+</sup> T cells, dendritic cells, macrophages, Tregs, CAFs, and MDSCs) in human sarcoma (SARC). (B) Representative Kaplan-Meier (KM) curves illustrating significantly positive (boxed in red) correlations between the expressions of CSC/EMT-associated genes (*SLC16A1*, *WISP1*, *VEGFA*, *TNC*) and the infiltration of immunosuppressive cells (CAFs, MDSCs) in SARC. The purity-adjusted Spearman's rank correlation test was applied to determine the *p*-values and partial correlation (cor) values. Significantly positive and negative correlations were determined, based on purity-adjusted Spearman's rho values ( $p < 0.05$ ). The data were sourced from the TIMER database (<http://timer.cistrome.org/>). T cell CD8<sup>+</sup>: cytotoxic t lymphocytes, T cell CD4<sup>+</sup>: helper T lymphocytes, Treg: regulatory T cells, CAF: cancer-associated fibroblasts, MDSC: myeloid-derived suppressor cells.

**Supplementary Table.** qPCR primers for onco-metabolic and immune modulatory genes.

| <b>Primers</b> | <b>Forward sequence</b>  | <b>Reverse sequence</b>   |
|----------------|--------------------------|---------------------------|
| <i>WISP1</i>   | CAAGAGGCCACGCAAGAC       | ACAGGAACTGCATAGCCTAC      |
| <i>POSTN</i>   | AGCAGACACACCTGTTGGAA     | ACGATTAAGGGAAGGTCGTTC     |
| <i>VEGFA</i>   | TCTTCAAGCCATCCTGTGTG     | TCTGCATGGTGATGTTGGAC      |
| <i>SLC16A1</i> | TTTCTTTGCGGCTTCCGTTGTTG  | CCATGGGGCTGAAGGGTAAATTGA  |
| <i>HK1</i>     | CCATGGGGCTGAAGGGTAAATTGA | CCAGACGGTGAAGGAACTGT      |
| <i>TNC</i>     | GAGATTTAGCCGTGTCTGAGGTTG | GCTTCAATCTCTCCTGGATGGC    |
| <i>CD276</i>   | AGGGCAGCCTATGACATTCC     | AGGGAGAAGGCTCCAAGACA      |
| <i>ITGA4</i>   | GCATACAGGTGTCCAGCAGAGA   | AGCTGCTTACCACCTTGGTCCT    |
| <i>MYC</i>     | TGAGGAGACACCGCCAC        | CAACATCGATTTCTTCCTCATCTTC |
| <i>PTN</i>     | ATGCAGGCTCAACAGTACCAGCA  | ACTCCACTGCCATTCTCCAC      |
